# Supplementary material for: Construction of titanium-based nanomaterials with a coral-like HTiOF3 template and their photocatalytic performance
Source: Royal Society of Chemistry journal article supplement (doi:10.1039/d2nj05187g), 2022-12-06
Supplement: d2nj05187g1.pdf [file d2nj05187g1.pdf]

Electronic supplementary information (ESI) for New Journal of Chemistry.

## Supporting Information (SI)

### Construction of titanium-based nanomaterials with coral-like HTiOF<sub>3</sub> template and their photocatalytic performance

*Huayang Liu,<sup>a</sup> Chentao Hou,<sup>\*a</sup> Mohammad Fahim Bakhtari,<sup>a</sup> Mingyuan Zhang<sup>\*a</sup> and  
Liping wang<sup>a</sup>*

[a]. College of Geology and Environment, Xi'an University of Science and Technology, Xi'an 710054, Shaanxi, P. R. China.

**\*Corresponding author, E-mail:** 807484470@qq.com; 17829819603@163.com

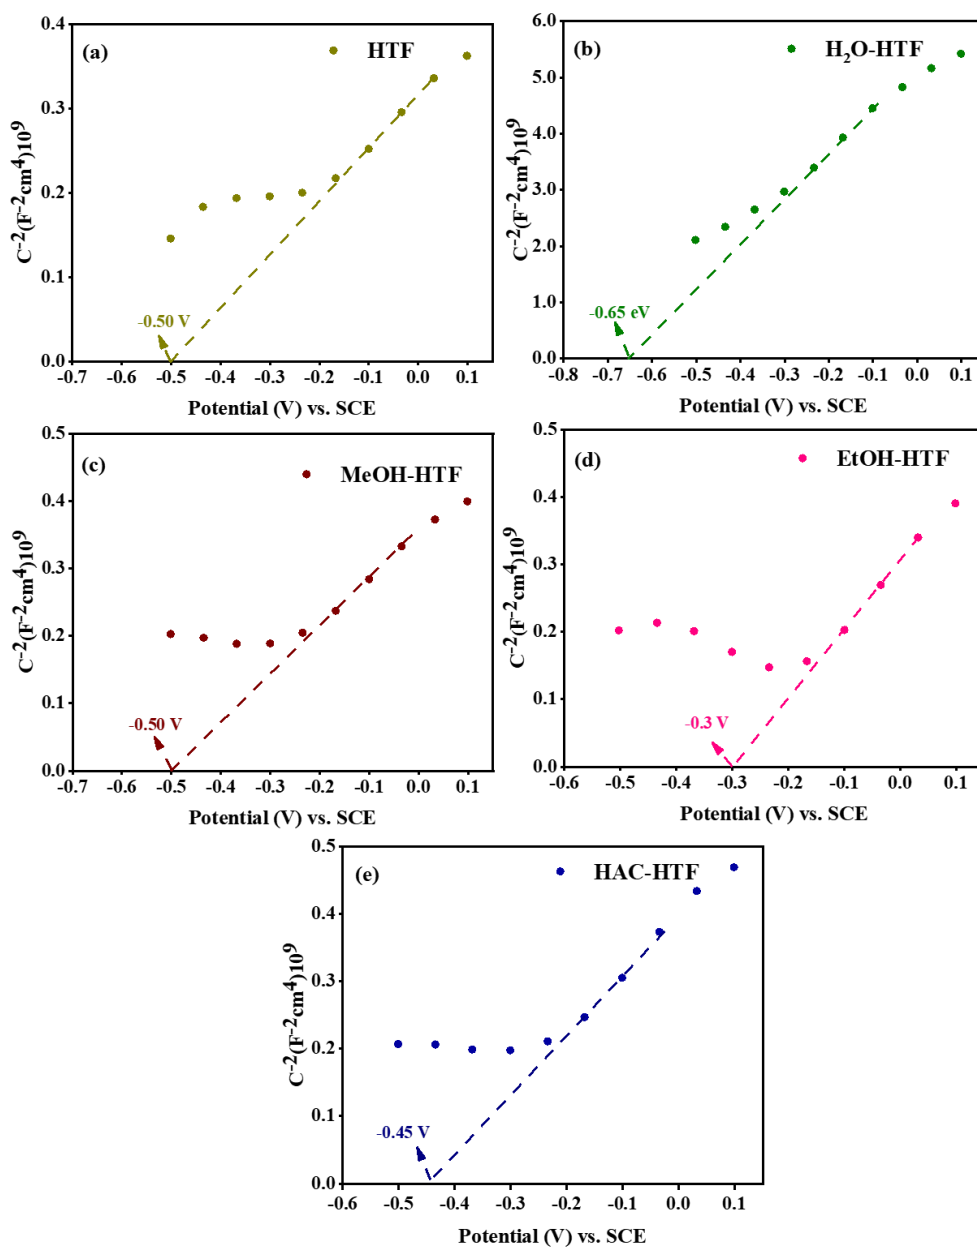

**Fig. S1** Mott-Schottky plots of HTF, H<sub>2</sub>O-HTF, MeOH-HTF, EtOH-HTF, and HAC-HTF at a frequency of 1000 Hz

**Table S1** The values of CB, VB and their bandgap energies of the samples

| Sample               | CB (V vs. NHE) | VB (V vs. NHE) | $E_g$ (eV) |
|----------------------|----------------|----------------|------------|
| HTF                  | -0.46          | 2.69           | 3.15       |
| H <sub>2</sub> O-HTF | -0.61          | 2.50           | 3.11       |
| MeOH-HTF             | -0.46          | 2.63           | 3.09       |
| EtOH-HTF             | -0.26          | 2.88           | 3.14       |
| HAC-HTF              | -0.41          | 2.73           | 3.14       |
| KOH-HTF              | -0.29          | 2.87           | 3.16       |

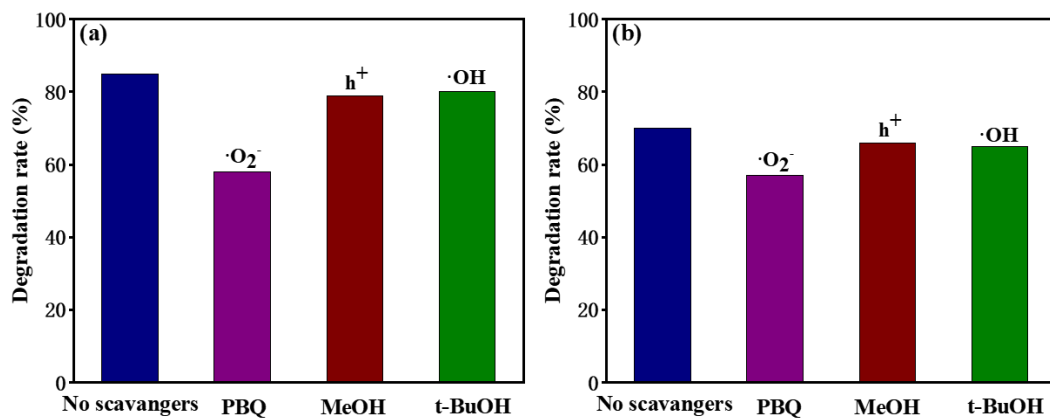

**Fig. S2** Effect of different scavengers on the degradation of OTC efficiency over EtOH-HTF and HAC-HTF

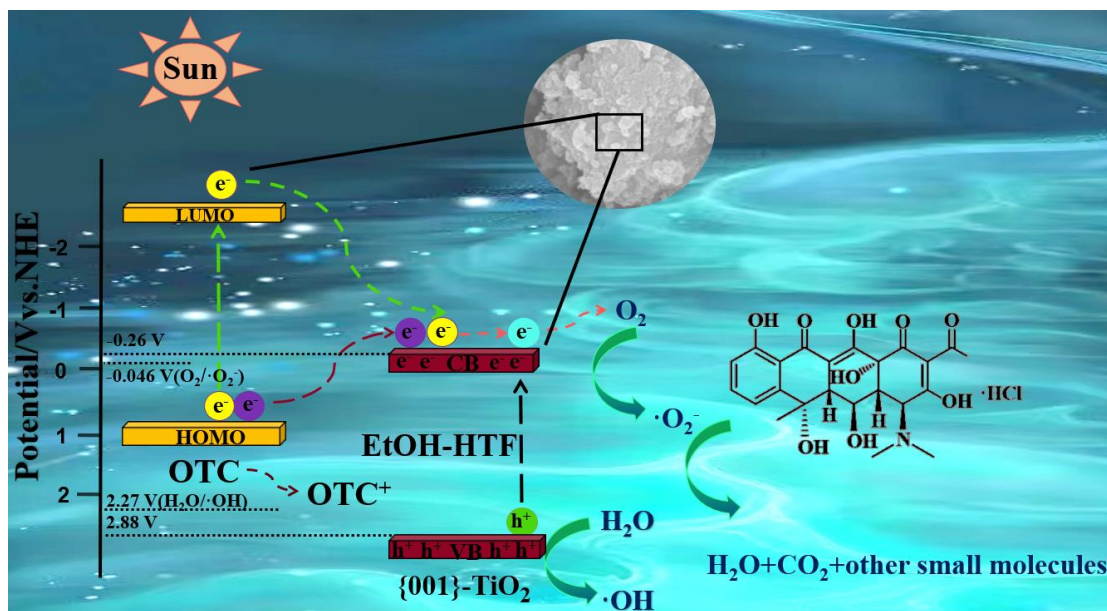

**Fig. S3** The photocatalytic mechanism of OTC degradation by EtOH-HTF

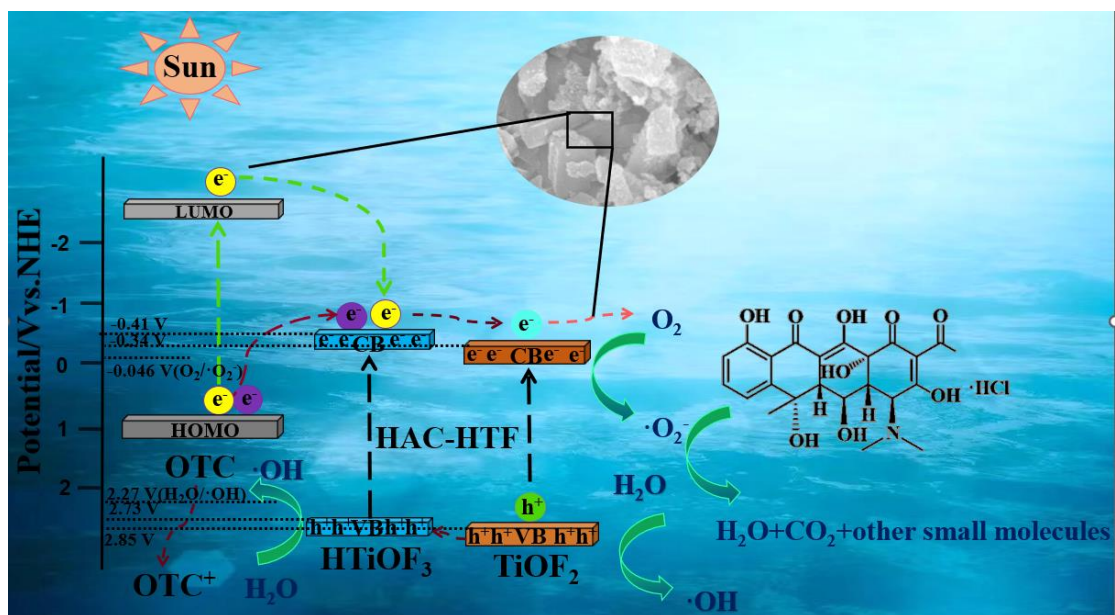

Fig. S4 The photocatalytic mechanism of OTC degradation by HAC-HTF
